# Factors associated with the uptake of seasonal influenza vaccination in adults: a systematic review

May P. S. Yeung<sup>1,2</sup>, Frank L.Y. Lam<sup>3</sup>, Richard Coker<sup>1</sup>

<sup>1</sup>Department of Public Health and Policy, London School of Hygiene and Tropical Medicine, London WC1E 7HT, UK

<sup>2</sup>The Jockey Club School of Public Health and Primary Care, The Chinese University of Hong Kong, Prince of Wales Hospital, Shatin, New Territories, Hong Kong, China

<sup>3</sup>Department of Chemical and Biomolecular Engineering, The Hong Kong University of Science and Technology, Hong Kong, China

Address correspondence to May P.S. Yeung, E-mail: may.yeung@cuhk.edu.hk

## ABSTRACT

**Background** Studies on different populations have shown that a variety of factors influence attitudes and decision in the general population on vaccine uptake. This study explores factors associated with the uptake of influenza vaccination among adults.

**Methods** A systematic literature review was performed on literature searched in databases EMBASE, MEDLINE, Cochrane Library and Electronic Theses Online Service up until November 2013. A critical appraisal framework was designed to assess the methodological quality of the studies.

**Results** Twenty-three articles met the inclusion criteria and were selected for outcome analysis and 21 were quantitative observational studies. Advancement in age (OR 1.06–23.7) and having chronic diseases (OR 1.38–13.7) were strongly indicative of vaccine uptake. Perceptions on vaccine efficacy (OR 2.7–10.55) and vaccine safety and adverse events (OR 10.5) were more influential than the level of knowledge on influenza and its vaccination. Advice from doctors/health professionals/family and/or close friends and free vaccination were also key factors in association with uptake of vaccination.

**Conclusions** This review highlighted the finding that perception on vaccine efficacy, perception on vaccine safety and adverse events, advice from doctors/health professionals/family/close friends and free vaccination are changeable factors that are strongly associated with influenza vaccination in adults aged 18–64.

**Keywords** adults, immunization, public health

## Background

Seasonal influenza vaccination (referred to as influenza vaccine or vaccine below) is effective in reducing influenza-like illnesses, working days lost and physician visits.<sup>1–3</sup> In many countries, only high-risk groups are subsidised or offered a free vaccination service. Non-high-risk groups usually include individuals of <65 years of age without a chronic disease, as well as those not working in the healthcare sector. In Australia, European countries and the USA, the influenza coverage rates for non-high-risk adults ranged from 5.8 to 45.1%.<sup>4–6</sup>

For most healthy adults, influenza is a mild and self-limiting disease. The health authorities of most countries do not consider healthy adults to be a priority group requiring annual vaccination against seasonal influenza.<sup>7</sup> Some exceptions include the USA, Austria and Estonia, which recommended that all people aged 6 months or older should receive influenza vaccination.<sup>8–10</sup>

The recent pandemic in 2009 may have shifted perspectives on vaccinating healthy adults. Reviews on international epidemiology reported that influenza A(H1N1)pdm09 virus disproportionately affected and increased hospitalization and death in adults aged below 65.<sup>11–13</sup> The influenza A(H1N1)pdm09 virus continued to be the predominant circulating strain in North America, Europe and China after the 2009 pandemic.<sup>14</sup>

Other benefits of vaccinating healthy adults included decreased work absenteeism and the need for medical visits and medication, including antibiotics.<sup>15</sup> Besides, many middle-aged adults have undiagnosed medical conditions such as diabetes mellitus.<sup>16,17</sup> Vaccination provides moderate

May P. S. Yeung, DrPH graduate

Frank L.Y. Lam, Adjunct Assistant Professor

Richard Coker, Professor

protection to both high-risk and non-high-risk groups from influenza as well as its complications.<sup>3,18</sup>

A better understanding of the reasons behind people's choice of vaccination will guide the planning of health and promotion programmes for improving general population vaccine coverage. This article is a systematic review of factors associated with the uptake of the seasonal influenza vaccination in adults aged 18–64.

## Methods

A systematic review was performed in November 2013 of published literature in medical databases EMBASE (1947–2013 November), MEDLINE (PubMed) (January 1966 to October 2013) and the Cochrane Library (1996 to present) including the Cochrane Central Register of Controlled Trials (CENTRAL), the Cochrane Database of Systematic Reviews (CDSR) and the Database of Abstracts of Reviews of Effects (DARE) via Cochrane Library. The search was further amplified by scanning the reference lists and bibliographies of relevant papers and the Electronic Theses Online Service (ETOS) using the defined keywords. The publications were in English.

Keywords used include a combination of free text terms and Medical Subject Heading (MeSH). Search terms included seasonal influenza vaccin\*, influenza vaccin\*, human, accept\*, attitude, intent\* and perception.

This study is on general population and not on influenza vaccine recommended group. Studies were excluded if >50% of study participants were not adults from the general population aged 18–64, or the study aim/objective was only related to the 2009 H1N1 pandemic vaccination. Studies focused on influenza recommended groups such as pregnant women, persons with chronic diseases and healthcare workers were also excluded. There was no limitation placed on the study design, but it had to have quantified the strength of association between the factors and the outcome.

Since most of the selected studies were observational studies and surveys, a critical appraisal framework was designed to assess the methodological quality of non-randomised trials. Reference has been made to the US CDC Transparent Reporting Evaluations with Nonrandomized Designs<sup>19</sup> and the National Health Service's (NHS) Critical Appraisal Skills Programme (CASP)<sup>20</sup> in reviewing the quality of the articles. The reporting of this review follows the Preferred Reporting Items for Systematic Reviews and Meta-Analyses (PRISMA) Statement to ensure scientific rigour and comprehensiveness in reporting.<sup>21</sup>

## Results

A total of 2235 articles published in English were identified. Twenty-three articles fulfilling the inclusion criteria were

retained for critical appraisal and analysis. Most of these articles were quantitative observational studies. There were 18 cross-sectional surveys, 1 case–control study, 1 randomized control trial, 2 longitudinal studies and 1 meta-analysis. The studies were carried out in the following countries: Australia, China, Japan, 11 European countries, France, Netherlands, Spain and the USA. The data collection period of the 23 selected articles was from 1997 to 2012. After review of the 23 selected articles, 21 were found to be of high or moderate methodological quality. The summary of the characteristics of these articles is shown in Table 1.

In the selected studies, the results comprised mostly subjective opinions given by study participants, rather than objective accounts obtained using validated tools. The associated factors were categorized into eight groups (demography, knowledge, need, health behaviour, belief and perceptions, healthcare system, advice and social support and external environment). The strengths of associated factors with influenza vaccination uptake are presented by adjusted odds ratios (ORs) in Table 2.

## Theories and models of behaviours

Most selected articles did not state what behavioural theory or model had been used. The Health Behavioural model was the commonest model and was cited in three articles. The Protection Motivation Theory, Theory of Reasoned Action, PRECEDE model and Utilities Theory were each used separately in one article.

## Demography

Increasing age was an important factor associated with uptake of vaccination in studies in European and Asian populations (OR 1.06–23.7).<sup>4,23,31,33</sup> Education level and being health professionals were inconsistently associated with getting vaccinated in different studies.<sup>4,29,31,32,40</sup> Sex, ethnic origin, income, employment and household size were not consistent predictors of influenza vaccination in different European countries.<sup>4,28</sup>

## Knowledge on influenza and influenza vaccine

There was a weak association between increased knowledge and vaccination, and the strength of this association was relatively weak compared with that of most of the other groups. People with better knowledge of influenza and its vaccination (OR 1.6–3.3)<sup>31,37</sup> and on the effective measures to prevent influenza (OR 1.59–3.06)<sup>37</sup> were more likely to get vaccinated. Those who had better knowledge about vaccination being required annually (OR 1.59),<sup>31</sup> of vaccine being recommended to some high-risk groups (OR 1.30),<sup>37</sup> and of other

**Table 1** Characteristics and key results of the included studies

| <i>First author<br/>place of study</i>                                                                                                         | <i>Study design</i>                                                 | <i>Participants</i>                                                                                 | <i>Data collection method and date</i>                                                                                         |
|------------------------------------------------------------------------------------------------------------------------------------------------|---------------------------------------------------------------------|-----------------------------------------------------------------------------------------------------|--------------------------------------------------------------------------------------------------------------------------------|
| Blank <i>et al.</i> <sup>4</sup><br>(Austria, Czech Republic, France,<br>Finland, Germany, Ireland, Italy,<br>Poland, Portugal, Spain and UK)  | Cross-sectional survey                                              | ~1200–2000 representative adults<br>per country                                                     | Annually repeated population-based<br>surveys (telephone, postal or face-to-face)<br>on influenza vaccination; 2006/07–2007/08 |
| Caille-Brillet <i>et al.</i> <sup>22</sup><br>France                                                                                           | Longitudinal study                                                  | 1451 individuals from 575 households                                                                | Data from Cohort for Pandemic Influenza<br>(CoPanFlu); December 2009                                                           |
| Carrasco-Garrido <i>et al.</i> <sup>23</sup><br>Madrid, Spain                                                                                  | Cross-sectional survey                                              | 7341 adults aged 16 and above                                                                       | Personal, home-based interviews using<br>structured questionnaire; November 2004<br>to June 2005                               |
| Cassidy <i>et al.</i> <sup>24</sup><br>USA                                                                                                     | Cross-sectional study                                               | 1311 patients attending AED                                                                         | Interview AED patients and retrieve records;<br>December 2005 to March 2006                                                    |
| Chapman and Coups <sup>25</sup><br>USA                                                                                                         | Cross-sectional survey                                              | 79 university employees and 435<br>corporate employees                                              | Interview and self-administered<br>questionnaire; fall 1997                                                                    |
| Chapman and Coups <sup>26</sup><br>USA                                                                                                         | Cross-sectional survey                                              | 412 corporate employees offered a<br>free flu vaccine                                               | Interview and self-administered<br>questionnaire; 1–10 December 1997                                                           |
| Cohen <i>et al.</i> <sup>27</sup><br>New York, USA                                                                                             | Cross-sectional, part of a<br>randomized controlled<br>trials (RCT) | 2788 participants from 509<br>households (contained ≥3 people in<br>the household)                  | 20 min structured interview, 2006/07 and<br>2007/08 flu seasons                                                                |
| Endrich <i>et al.</i> <sup>28</sup><br>Austria, Czech Republic, France,<br>Finland, Germany, Ireland, Italy,<br>Poland, Portugal, Spain and UK | Longitudinal survey                                                 | 92 101 participants from 11 different<br>European countries                                         | Annually repeated population-based<br>surveys (telephone, postal or face-to-face)<br>on influenza vaccination; 2001/02–2006/07 |
| Horby PW <i>et al.</i> <sup>29</sup><br>Australia                                                                                              | Cross-sectional survey                                              | 1496 people aged 40–64                                                                              | Computer-assisted telephone interview; 19<br>October to 15 November 2001                                                       |
| Hong Kong Medical Association <sup>30</sup><br>Hong Kong, China                                                                                | Cross-sectional survey                                              | 1013 Cantonese-speaking Hong Kong<br>Citizens of age 18 or above                                    | Web-based computer-assisted telephone<br>interview; 6–16 November 2012                                                         |
| Lau <i>et al.</i> <sup>31</sup><br>Hong Kong, China                                                                                            | Cross-sectional survey                                              | 1102 Hong Kong Chinese adults aged<br>18–64                                                         | Random telephone survey; April to May<br>2006                                                                                  |
| Liao <i>et al.</i> <sup>32</sup><br>Hong Kong, China                                                                                           | Cross-sectional survey                                              | 505 Chinese students and employees<br>from a university                                             | Online survey. Wave 1: January and March<br>2009; Wave 2: January and March 2010                                               |
| Lin <i>et al.</i> <sup>33</sup><br>USA                                                                                                         | Randomized cluster trial                                            | 2389 workers aged 18–49                                                                             | Questionnaire; 2007–2008 vaccination<br>season                                                                                 |
| Looijmans-van den Akker <i>et al.</i> <sup>34</sup><br>Netherlands                                                                             | Cross-sectional survey                                              | 1725 Dutch patients age over 50 years<br>random selected in a university<br>medical centre database | Self-administered questionnaire; 2005                                                                                          |
| Mok <i>et al.</i> <sup>35</sup><br>Hong Kong, China                                                                                            | Cross-sectional survey                                              | 452 outpatient clinic patients aged<br>≥18, able to read and speak Chinese                          | Self-administered questionnaire; September<br>to October 2004                                                                  |
| Santibanez <i>et al.</i> <sup>36</sup><br>USA                                                                                                  | Cross-sectional survey                                              | 4835 participants at 50–64 years old                                                                | Telephone survey; February to May 2004                                                                                         |
| Takahashi <i>et al.</i> <sup>37</sup><br>Japan                                                                                                 | Case–control study                                                  | 98 out-patients aged 18 or above                                                                    | Telephone interview; November 1998 to<br>February 1999                                                                         |
| Thomas <i>et al.</i> <sup>38</sup><br>Multiple (review)                                                                                        | Meta-analysis on<br>randomized controlled<br>trials (RCT)           | 44 RCTs were included                                                                               | Meta-analysis with pooled OR and<br>systematic analysis                                                                        |
| Uscher-Pines <i>et al.</i> <sup>39</sup><br>USA                                                                                                | Cross-sectional survey                                              | 4040 adults aged 18 and above                                                                       | Draw data from a nationally representative<br>survey conducted on 5–24 March 2010                                              |

*Continued*

Table 1 Continued

| First author<br>place of study                           | Study design           | Participants                                     | Data collection method and date                                                        |
|----------------------------------------------------------|------------------------|--------------------------------------------------|----------------------------------------------------------------------------------------|
| Vaux <i>et al.</i> <sup>40</sup><br>France               | Cross-sectional survey | 10 091 people from 8905 households               | Telephone survey, May 2009 to April 2010                                               |
| Vlahov <i>et al.</i> <sup>41</sup><br>New York City, USA | Cross-sectional survey | 991 participants from medically underserved area | Street-intercept method; 10 min survey; end of the 2009/10 flu season                  |
| Wada and Smith <sup>42</sup><br>Japan                    | Cross-sectional survey | 3192 Japanese aged 20–69                         | Web-based survey for those registered in a web-based survey company                    |
| Wu <i>et al.</i> <sup>43</sup><br>Beijing, China         | Cross-sectional survey | 13 002 Chinese adults ≥ 18 years                 | Interviewers visited the households and conducted face-to-face interview; January 2011 |

general information about influenza transmission and treatment (OR 1.25),<sup>27</sup> were slightly more likely to choose to be vaccinated than those without adequate knowledge.

### Needs

Presence of chronic disease(s) was the most frequently stated reason for people getting vaccinated (OR 1.38–13.7).<sup>4,23,24,27–29,32,35,40</sup> Recent visits to a medical doctor may or may not have been associated with vaccination.<sup>23,36,37</sup> People consulted doctors for acute and chronic illnesses and therefore visiting a medical doctor did not imply their having long-term illnesses. The association of living with children or elders at home was inconclusive.<sup>40,42</sup> It is uncertain if self-reported health status had an association.<sup>30,36</sup>

### Health behaviour

Previous influenza vaccination was a good predictor for subsequent vaccination (OR 4.06–5.18).<sup>25,32,35,42</sup> Health behaviour such as smoking was not associated.<sup>34,42</sup> No data were found on other health behaviours such as drinking or frequent exercise.

### Belief and perception

Belief and perception were difficult to distinguish from each other so they were grouped under the same heading. Perception of vaccine efficacy (OR 2.7–10.55) had the strongest association in this group.<sup>29,36,37</sup> The perceived vaccine safety and adverse events after vaccination were a concern (OR 10.5) and fear of adverse reaction deterred people from getting vaccinated (OR 0.21).<sup>37</sup> The perceived chances of contracting influenza (OR 1.62–5.40) and the perceived health impact of having influenza (OR 2.21) were also positively associated with intention to get vaccinated.<sup>31</sup> It is inconclusive whether fear of injections had an association.<sup>30,37</sup>

### Healthcare system

Free vaccination (OR 4.5–7.8) was strongly associated with vaccination.<sup>38,40</sup> People who had easy access (OR 1.8) and who were satisfied with their healthcare service were more likely to receive the influenza vaccine (OR 1.23).<sup>23,34</sup> The usefulness of interventions to remind clients, such as telephone calls and post card reminders, was uncertain.<sup>38</sup>

### Advice and social support

Doctors' advice (OR 4.03–7.82) and health professionals' advice (OR 1.23–13.0) were significantly correlated with influenza vaccination.<sup>4,23,37,39</sup> Recommendation from healthcare workers was an intervention encouraged by many of the selected articles based on its strong association. Relatives' or close friends' advice (OR 17.74), or their having received influenza vaccination in the previous year (OR 6.44), was associated with acceptance of influenza vaccine in a Japanese study.<sup>37,39</sup>

### External environment

Past experiences of infectious diseases and widespread severe epidemic could influence people's perception of vaccination.<sup>44</sup> The post-pandemic effect on seasonal influenza vaccination varied in different places. In Beijing China, a study did not find any impact of the 2009 pandemic on vaccination in the 2010/11 season.<sup>43</sup> In France, there was a moderate negative effect of the 2009 pandemic on vaccination in the following two seasons.<sup>22</sup>

## Discussion

### Main finding of this study

Advancement in age (OR 1.06–23.7) and having chronic disease(s) (OR 1.38–13.7) were the two most consistent and

**Table 2** Summary of factors (variables) associated with uptake of influenza vaccination.

| Group                       | Factors                                                                                                       | Odds ratio (range of mean OR)                               |
|-----------------------------|---------------------------------------------------------------------------------------------------------------|-------------------------------------------------------------|
| 1 Demography                | – age <sup>4,23,31,33</sup>                                                                                   | – 1.06–23.7                                                 |
|                             | – education level <sup>4,29,31,32,40</sup>                                                                    | – insignificant/1.54–2.25                                   |
|                             | – being health professional <sup>4,28,29,31</sup>                                                             | – insignificant/2.4–4.9                                     |
|                             | – married <sup>32</sup>                                                                                       | – 2.71                                                      |
|                             | – gender, ethnic origin, income, employment, household size <sup>4,28,40</sup>                                | – insignificant or varies                                   |
| 2 Knowledge                 | – knowledge of influenza and influenza vaccination <sup>31,37</sup>                                           | – 1.6–3.3                                                   |
|                             | – knowledge of effective measures to prevent influenza <sup>29,37</sup>                                       | – 1.59–3.06                                                 |
|                             | – knowledge that vaccination was required annually <sup>31</sup>                                              | – 1.59                                                      |
|                             | – knowledge of influenza vaccine being recommended <sup>37</sup>                                              | – 1.30                                                      |
|                             | – general knowledge on transmission and treatment of influenza and upper-respiratory infections <sup>27</sup> | – 1.25                                                      |
| 3 Needs                     | – the presence of chronic disease(s) <sup>4,23,24,27,28,29,32,35,40</sup>                                     | – 1.38–13.7                                                 |
|                             | – visit to physician recently <sup>23,36,37</sup>                                                             | – insignificant/1.55–2.0                                    |
|                             | – living with children and/or elders <sup>40,42</sup>                                                         | – insignificant/1.37                                        |
|                             | – self-reported health status <sup>36</sup>                                                                   | – insignificant                                             |
| 4 Health behaviour          | – previous influenza vaccination status <sup>25,32,35,42</sup>                                                | – 4.06–5.18                                                 |
|                             | – smoking <sup>34,42</sup>                                                                                    | – insignificant/0.79                                        |
| 5 Belief and perceptions    | – perceived vaccine efficacy <sup>29,36,37</sup>                                                              | – 2.7–10.55                                                 |
|                             | – perceived vaccine safety and adverse events <sup>37</sup>                                                   | – 10.5                                                      |
|                             | – perceived chances of contracting influenza <sup>36,41</sup>                                                 | – 1.62–5.40                                                 |
|                             | – perceived health impact of having influenza <sup>31</sup>                                                   | – 2.21                                                      |
|                             | – fear of adverse reactions <sup>37</sup>                                                                     | – 0.21                                                      |
| 6 HealthCare Systems        | – scare about injection <sup>37</sup>                                                                         | – insignificant                                             |
|                             | – free vaccination <sup>38,40</sup>                                                                           | – 4.5–7.8                                                   |
|                             | – access to healthcare settings <sup>34</sup>                                                                 | – 1.8                                                       |
|                             | – satisfied with the health services <sup>23</sup>                                                            | – 1.23                                                      |
| 7 Advice and social support | – client reminder system (e.g. telephone, post cards) <sup>38</sup>                                           | – inconsistent result                                       |
|                             | – advice from doctors <sup>4,23,37</sup>                                                                      | – 4.03–7.82                                                 |
|                             | – advice from health professionals <sup>23,37</sup>                                                           | – 1.23–13.0                                                 |
|                             | – advice from family and/or close friends <sup>37</sup>                                                       | – 17.74                                                     |
|                             | – cues to action (relative and friends receive vaccine) <sup>37</sup>                                         | – 6.44                                                      |
| 8 External environment      | – pandemics <sup>22,43</sup>                                                                                  | – insignificant/moderate negative (i.e. reduce vaccination) |

Findings of three selected studies<sup>26,30,39</sup> were not presented in this table but included in the text or other table. All references in bold are of moderate methodology quality and the rest are of high methodology quality.

strongly associated factors for influenza vaccine uptake. Increase in age usually increases the chance of contracting chronic diseases, so these two factors were related. Perceptions such as vaccine efficacy (OR 2.7–10.55), and safety and adverse events (OR 10.5), were more influential than the level of knowledge on influenza and its vaccination. Meta-analysis supported the notion that risk perceptions are central to many health behaviours.<sup>45</sup> Although there is a general consensus that knowledge is positively correlated with positive health behaviours, the selected studies demonstrated a mild association of the two here. If greater knowledge increased the tendency to be vaccinated, one would expect

doctors, nurses and other health professionals to have a high vaccination rate, irrespective of whether it was compulsory or not. However, being a health professional was not associated with vaccination in some European countries (Germany, Italy and Poland).<sup>4</sup> The coverage rates were generally low among health professionals in the same study on 11 European countries, with coverage ranging from the lowest at 6.4% (Poland) to 26.3% (Czech Republic).<sup>4</sup> Advice from doctors/health professionals/family/close friends and free vaccinations were other crucial factors that determined the choice of many to be vaccinated. Hence, health professionals could help to implement influenza



vaccination programmes and contribute to increasing the vaccination coverage rates in their patients.

Past experiences of influenza pandemic vaccination and the widespread severe epidemic could influence perception on vaccination. However, evidence demonstrated that a past pandemic was only insignificantly or moderately negatively associated with (i.e. reduced) later seasonal vaccination.

### What is already known on this topic?

The fact that people have positive perceptions regarding vaccination or have even expressed their interest in receiving the vaccine does not necessarily lead them to receive the actual vaccination.<sup>46</sup> A meta-analysis with 47 experimental tests on behavioural intentions and behaviour concluded that a medium to large change in intention leads to a small to medium change in behaviour.<sup>47</sup> Even of those who had intended to get vaccinated, only half had actually been vaccinated.<sup>48</sup> One solution would be to follow up participants and verify their actual behaviour after their verbal response.

A person's decision to uptake influenza vaccination is influenced by a number of contributing factors. Most of the published articles were surveys and they reflected the conscious subjective opinions of individuals. Choice of uptake could also be influenced by change of health service, media, culture, values and social norms.

### What this study adds?

This is a systematic and evidence-based approach to the survey design. A range of ORs for factors associated with influenza uptake are presented and grouped artificially into eight domains (Table 2). These ORs were indicative of the strengths of associations between the factors that influence attitudes and decision in the general population on vaccine uptake. The selected studies used broad and imprecise terms such as 'knowledge of influenza and influenza vaccination' and 'access to healthcare settings', and these would be subjected to respondents' interpretation. Therefore, the ORs are not meant to be compared using their absolute values, neither within nor across domain. However, the consistency and coherence of high ORs of a factor were strongly indicative of a high strength of association across populations.

### Limitations of this study

Since most included articles are cross-sectional surveys, recall bias and/or report bias exists. For self-administered questionnaires, misclassification could have occurred due to cultural or religious differences, e.g. the report of having chronic disease(s). Nonetheless, the approach of analyzing self-reported data on chronic conditions was reasonably accurate.<sup>49</sup> The

sample was also restricted by the sampling method, e.g. individuals without a home telephone were excluded for telephone interviews.

A meta-analysis of the adjusted ORs in the selected articles was not performed. While the selected studies all examine the factors associated with the uptake of the seasonal influenza vaccination, there are substantial heterogeneities among them. There is diversity in the demography of the study respondents, because data were collected from >15 countries. Methodological variation exists, because studies had different aims, sampling subject recruitment criteria, scope of question asked and outcomes measurement. Besides, because many of the associated factors (variables) were examined in one to three studies, pooling of data would not represent the overall result.

Articles on pH1N1 pandemic vaccination were excluded, because the determinants for seasonal influenza vaccination were different from that of pH1N1 pandemic vaccination.<sup>40</sup> Systematic reviews found that younger age, believing in vaccine safety and/or effectiveness, and higher socioeconomic status were important determinants of the pH1N1 vaccine.<sup>50,51</sup> The perceived mild nature of the disease and the impact of extensive media publicity on adverse events after vaccination were major reasons the public refused the pH1N1 vaccine.<sup>50,52</sup>

## Conclusions

This review highlighted the finding that perception on vaccine efficacy, perception on vaccine safety and adverse events, advice from doctors/health professionals/family/close friends and free vaccination are changeable factors that are strongly associated with influenza vaccination in adults aged 18–64.

## Authors' contributions

M.P.S.Y. generated the research framework and methods; collected, analysed and interpreted the data and drafted the manuscript. F.L.Y.L. contributed to the study selection criteria and performed critical appraisal of the articles. R.C. contributed to the conception, design, analysis and interpretation of the study and critically revised the manuscript. All authors read and approved the final manuscript.

## Acknowledgements

We gratefully acknowledge the professional guidance of Stephen Sek Kam CHAN, Shui Shan LEE, Stephen Kam Cheung NG, Edmond Tak Fai TONG, Nguyen-Van-Tam and Mark Jit.

## References

- 1 Bridges CB, Thompson WW, Meltzer MI *et al.* Effectiveness and cost-benefit of influenza vaccination of healthy working adults: a randomized controlled trial. *JAMA* 2000;**284**(13):1655–63.
- 2 Nichol KL, Lind A, Margolis KL *et al.* The effectiveness of vaccination against influenza in healthy, working adults. *N Engl J Med* 1995;**333**(14):889–93.
- 3 Jefferson T, Di Pietrantonj C, Rivetti A *et al.* Vaccines for preventing influenza in healthy adults. *Cochrane Database Syst Rev* 2007;**(2)**: CD001269.
- 4 Blank PR, Schwenkglenks M, Szucs TD. Vaccination coverage rates in eleven European countries during two consecutive influenza seasons. *J Infect* 2009;**58**(6):446–58.
- 5 Australian Institute of Health and Welfare. 2009 Adult Vaccination Survey: summary results. Canberra: AIHW 2011.
- 6 Centers for Disease Control and Prevention, Flu Vaccination Coverage, United States, 2012–13 Influenza Season. Atlanta, USA, 2013. <http://www.cdc.gov/flu/fluavxview/coverage-1213estimates.htm> (10 December 2015, date last accessed).
- 7 World Health Organisation. Vaccines against influenza WHO position paper - November 2012. *Wkly Epidemiol Rec* 2012;**87**(47): 461–76.
- 8 Mereckiene J, Cotter S, D'Ancona F *et al.* Differences in national influenza vaccination policies across the European Union, Norway and Iceland 2008–2009. *Euro Surveill* 2010;**15**(44). pii: 19700.
- 9 Nokleby H, Nicoll A. Risk groups and other target groups - preliminary ECDC guidance for developing influenza vaccination recommendations for the season 2010–11. *Euro Surveill* 2010;**15**(12). pii: 19525.
- 10 Centers for Disease Control Prevention. Prevention and control of seasonal influenza with vaccines. Recommendations of the Advisory Committee on Immunization Practices—United States, 2013–2014. *MMWR Recomm Rep* 2013;**62**(RR-07):1–43.
- 11 Girard MP, Tam JS, Assossou OM *et al.* The 2009 A (H1N1) influenza virus pandemic: a review. *Vaccine* 2010;**28**:4895–902.
- 12 Jhung MA, Swerdlow D, Olsen SJ *et al.* Epidemiology of 2009 pandemic influenza A (H1N1) in the United States. *Clin Infect Dis* 2011;**52**(Suppl. 1):S13–26.
- 13 World Health Organization. Summary review of the 2010–2011 northern hemisphere winter influenza season. 2010. [http://www.who.int/influenza/surveillance\\_monitoring/2010\\_2011\\_GIP\\_surveillance\\_seasonal\\_review/en/index.html](http://www.who.int/influenza/surveillance_monitoring/2010_2011_GIP_surveillance_seasonal_review/en/index.html) (10 November 2013, date last accessed).
- 14 WHO Global Influenza Surveillance and Response System. *Influenza update: 27 January 2014 - Update number 203*. 2014.
- 15 Advisory Committee on Immunization Practices, Smith NM, Bresee JS *et al.* Prevention and control of Influenza: recommendations of the Advisory Committee on Immunization Practices (ACIP). *MMWR Recomm Rep* 2006;**55**(Rr-10):1–42.
- 16 Pierce MB, Zaninotto P, Steel N *et al.* Undiagnosed diabetes-data from the English longitudinal study of ageing. *Diabet Med* 2009;**26**(7):679–85.
- 17 National Center for Chronic Disease Prevention and Health Promotion (USA). 2011 National Diabetes Fact Sheet. Diabetes Public Health Resource, 2013. 15 October 2015. <http://www.cdc.gov/diabetes/pubs/estimates11.htm> (2 February 2014, date last accessed).
- 18 Osterholm MT, Kelley NS, Sommer A *et al.* Efficacy and effectiveness of influenza vaccines: a systematic review and meta-analysis. *Lancet Infect Dis* 2012;**12**(1):36–44.
- 19 Des Jarlais DC, Lyles C, Crepaz N: TREND Group. Improving the reporting quality of nonrandomized evaluations of behavioral and public health interventions: the TREND statement. *Am J Public Health* 2004;**94**(3):361–6.
- 20 Critical Appraisal Skills Programme (CASP). Appraising the Evidence. 2013. <http://www.casp-uk.net/find-appraise-act/appraising-the-evidence/> (10 December 2013, date last accessed).
- 21 Moher D, Liberati A, Tetzlaff J *et al.* Preferred reporting items for systematic reviews and meta-analyses: the PRISMA statement. *Int J Surg* 2010;**8**(5):336–41.
- 22 Caille-Brillet AL, Raude J, Lapidus N *et al.* Trends in influenza vaccination behaviours - results from the CoPanFlu cohort, France, 2006 to 2011. *Euro Surveill* 2013;**18**(45):20628.
- 23 Carrasco-Garrido P, de Andrés AL, Hernández-Barrera V *et al.* Patient's perceptions and information provided by the public health service are predictors for influenza vaccine uptake. *Hum Vaccin* 2009;**5**(12):839–42.
- 24 Cassidy W, Marioneaux DM, Windham AF *et al.* Factors influencing acceptance of influenza vaccination given in an ED. *Am J Emerg Med* 2009;**27**(9):1027–33.
- 25 Chapman GB, Coups EJ. Predictors of influenza vaccine acceptance among healthy adults. *Prev Med* 1999;**29**(4):249–62.
- 26 Chapman GB, Coups EJ. Time preferences and preventive health behavior: acceptance of the influenza vaccine. *Med Decis Making* 1999;**19**(3):307–14.
- 27 Cohen B, Ferng YH, Wong-McLoughlin J *et al.* Predictors of flu vaccination among urban Hispanic children and adults. *J Epidemiol Community Health* 2012;**66**:204–9.
- 28 Endrich MM, Blank PR, Szucs TD. Influenza vaccination uptake and socioeconomic determinants in 11 European countries. *Vaccine* 2009;**27**(30):4018–24.
- 29 Horby PW, Williams A, Burgess MA *et al.* Prevalence and determinants of influenza vaccination in Australians aged 40 years and over—a national survey. *Aust N Z J Public Health* 2005;**29**(1):35–7.
- 30 Hong Kong Medical Association (HKMA). Survey on Hong Kong Citizens' Knowledge and Opinion of Influenza Vaccination 2012. 2012. <http://hkupop.hku.hk/english/report/hkmaInfluenza/index.html> (14 May 2013, date last accessed).
- 31 Lau JT, Au DW, Tsui HY *et al.* Prevalence and determinants of influenza vaccination in the Hong Kong Chinese adult population. *Am J Infect Control* 2012;**40**(7):e225–7.
- 32 Liao QY, Wong WS, Fielding R. Comparison of different risk perception measures in predicting seasonal influenza vaccination among healthy chinese adults in Hong Kong: a prospective longitudinal study. *PLoS One* 2013;**8**(7):e68019.
- 33 Lin CJ, Nowalk MP, Toback SL *et al.* Importance of vaccination habit and vaccine choice on influenza vaccination among healthy working adults. *Vaccine* 2010;**28**(48):7706–12.

- 34 Looijmans-van den Akker I, van den Heuvel PM, Verheij T *et al.* No intention to comply with influenza and pneumococcal vaccination: behavioural determinants among smokers and non-smokers. *Prev Med* 2007;**45**(5):380–5.
- 35 Mok E, Yeung SH, Chan MF. Prevalence of influenza vaccination and correlates of intention to be vaccinated among Hong Kong Chinese. *Public Health Nurs* 2006;**23**(6):506–15.
- 36 Santibanez TA, Mootrey GT, Euler GL *et al.* Behavior and beliefs about influenza vaccine among adults aged 50–64 years. *Am J Health Behav* 2010;**34**(1):77–89.
- 37 Takahashi O, Noguchi Y, Rahman M *et al.* Influence of family on acceptance of influenza vaccination among Japanese patients. *Fam Pract* 2003;**20**(2):162–6.
- 38 Thomas RE, Russell M, Lorenzetti D. Interventions to increase influenza vaccination rates of those 60 years and older in the community. *Cochrane Database Syst Rev* 2010;**(9)**: CD005188.
- 39 Uscher-Pines L, Maurer J, Kellerman A *et al.* Healthy young and middle age adults: what will it take to vaccinate them for influenza? *Vaccine* 2010;**28**(46):7420–2.
- 40 Vaux S, Van Cauteren D, Guthmann JP *et al.* Influenza vaccination coverage against seasonal and pandemic influenza and their determinants in France: a cross-sectional survey. *BMC Public Health* 2011;**11**:30.
- 41 Vlahov D, Bond KT, Jones KC *et al.* Factors associated with differential uptake of seasonal influenza immunizations among underserved communities during the 2009–2010 influenza season. *J Community Health* 2012;**37**(2):282–7.
- 42 Wada K, Smith DR. Influenza vaccination uptake among the working age population of Japan: results from a national cross-sectional survey. *PLoS One* 2013;**8**(3):e59272.
- 43 Wu SS, Yang P, Li H *et al.* Influenza vaccination coverage rates among adults before and after the 2009 influenza pandemic and the reasons for non-vaccination in Beijing, China: a cross-sectional study. *BMC Public Health* 2013;**13**:636.
- 44 May T. Public communication, risk perception, and the viability of preventive vaccination against communicable diseases. *Bioethics* 2005;**19**(4):407–21.
- 45 Brewer NT, Chapman GB, Gibbons FX *et al.* Meta-analysis of the relationship between risk perception and health behavior: the example of vaccination. *Health Psychol* 2007;**26**(2):136–45.
- 46 Harris KM, Maurer J, Lurie N. Do people who intend to get a flu shot actually get one? *J Gen Intern Med* 2009;**24**(12):1311–3.
- 47 Webb TL, Sheeran P. Does changing behavioral intentions engender behavior change? A meta-analysis of the experimental evidence. *Psychol Bull* 2006;**132**(2):249–68.
- 48 Harris KM, Maurer J, Uscher-Pines L *et al.* *Seasonal Flu Vaccination: Why Don't More Americans Get It?* Santa Monica, CA: RAND Corporation, 2011.
- 49 Martin LM, Leff M, Calonge N *et al.* Validation of self-reported chronic conditions and health services in a managed care population. *Am J Prev Med* 2000;**18**(3):215–8.
- 50 Bish A, Yardley L, Nicoll A *et al.* Factors associated with uptake of vaccination against pandemic influenza: a systematic review. *Vaccine* 2011;**29**(38):6472–84.
- 51 Brien S, Kwong JC, Buckeridge DL. The determinants of 2009 pandemic A/H1N1 influenza vaccination: a systematic review. *Vaccine* 2012;**30**(7):1255–64.
- 52 Rubin GJ, Potts HW, Michie S. The impact of communications about swine flu (influenza A H1N1v) on public responses to the outbreak: results from 36 national telephone surveys in the UK. *Health Technol Assess* 2010;**14**(34):183–266.
